# Supplementary material for: A rhodamine B-based “turn-on” fluorescent sensor for detecting Cu2+ and sulfur anions in aqueous media
Source: Royal Society of Chemistry journal article supplement (doi:10.1039/c3ra45931d), 2013-12-17
Supplement: c3ra45931d.pdf [file c3ra45931d.pdf]

## Supporting Information

### A rhodamine B-based “turn-on” fluorescent sensor for detecting Cu<sup>2+</sup> and sulfur anion in aqueous media

Dan Guo,<sup>a,b</sup> Zhengping Dong,<sup>a</sup> Chao Luo,<sup>a</sup> Wengyan Zan,<sup>a</sup> Shiqiang Yan<sup>a,\*</sup> and Xiaojun Yao<sup>a</sup>

<sup>a</sup>College of Chemistry and Chemical Engineering, Lanzhou University, Lanzhou 730000, PR China

<sup>b</sup>Huayin Ordnance Test Center, Huayin 714200, China

#### Table of contents

|                                                              |   |
|--------------------------------------------------------------|---|
| <sup>1</sup> H NMR spectrum of Compound 2-----               | 2 |
| <sup>13</sup> C NMR spectrum of Compound 2-----              | 3 |
| <sup>1</sup> H NMR spectrum of L -----                       | 4 |
| <sup>13</sup> C NMR spectrum of L-----                       | 6 |
| ESI-MS spectrum of L -----                                   | 6 |
| Scheme S1 -----                                              | 6 |
| ESI-MS spectrum of L-Cu <sup>2+</sup> -----                  | 7 |
| Figure S8-----                                               | 8 |
| ESI-MS spectrum of L-Cu <sup>2+</sup> +S <sup>2-</sup> ----- | 9 |

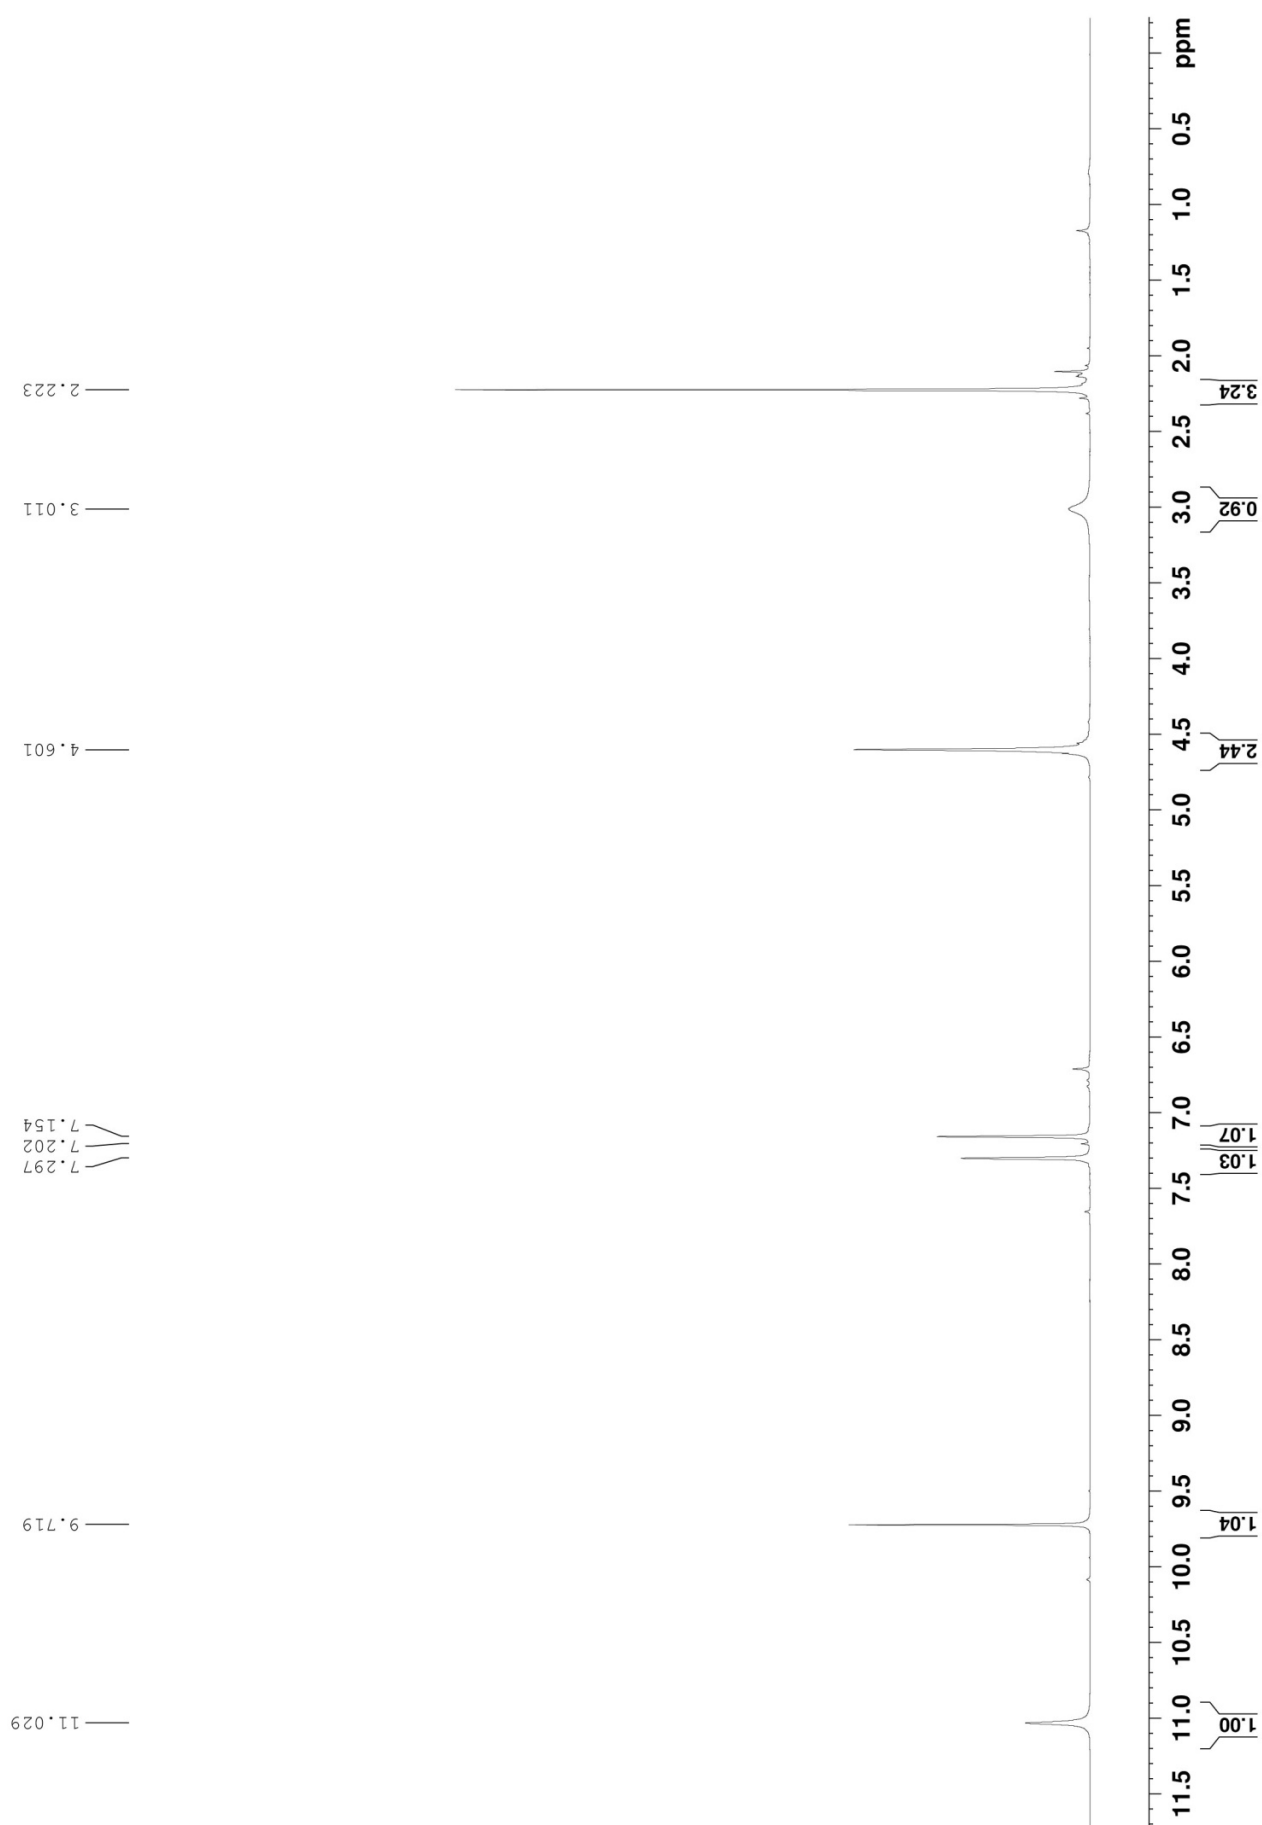

**Figure S1**  $^1\text{H}$  NMR ( $\text{CDCl}_3$ , 400 MHz) spectrum of Compound 2.

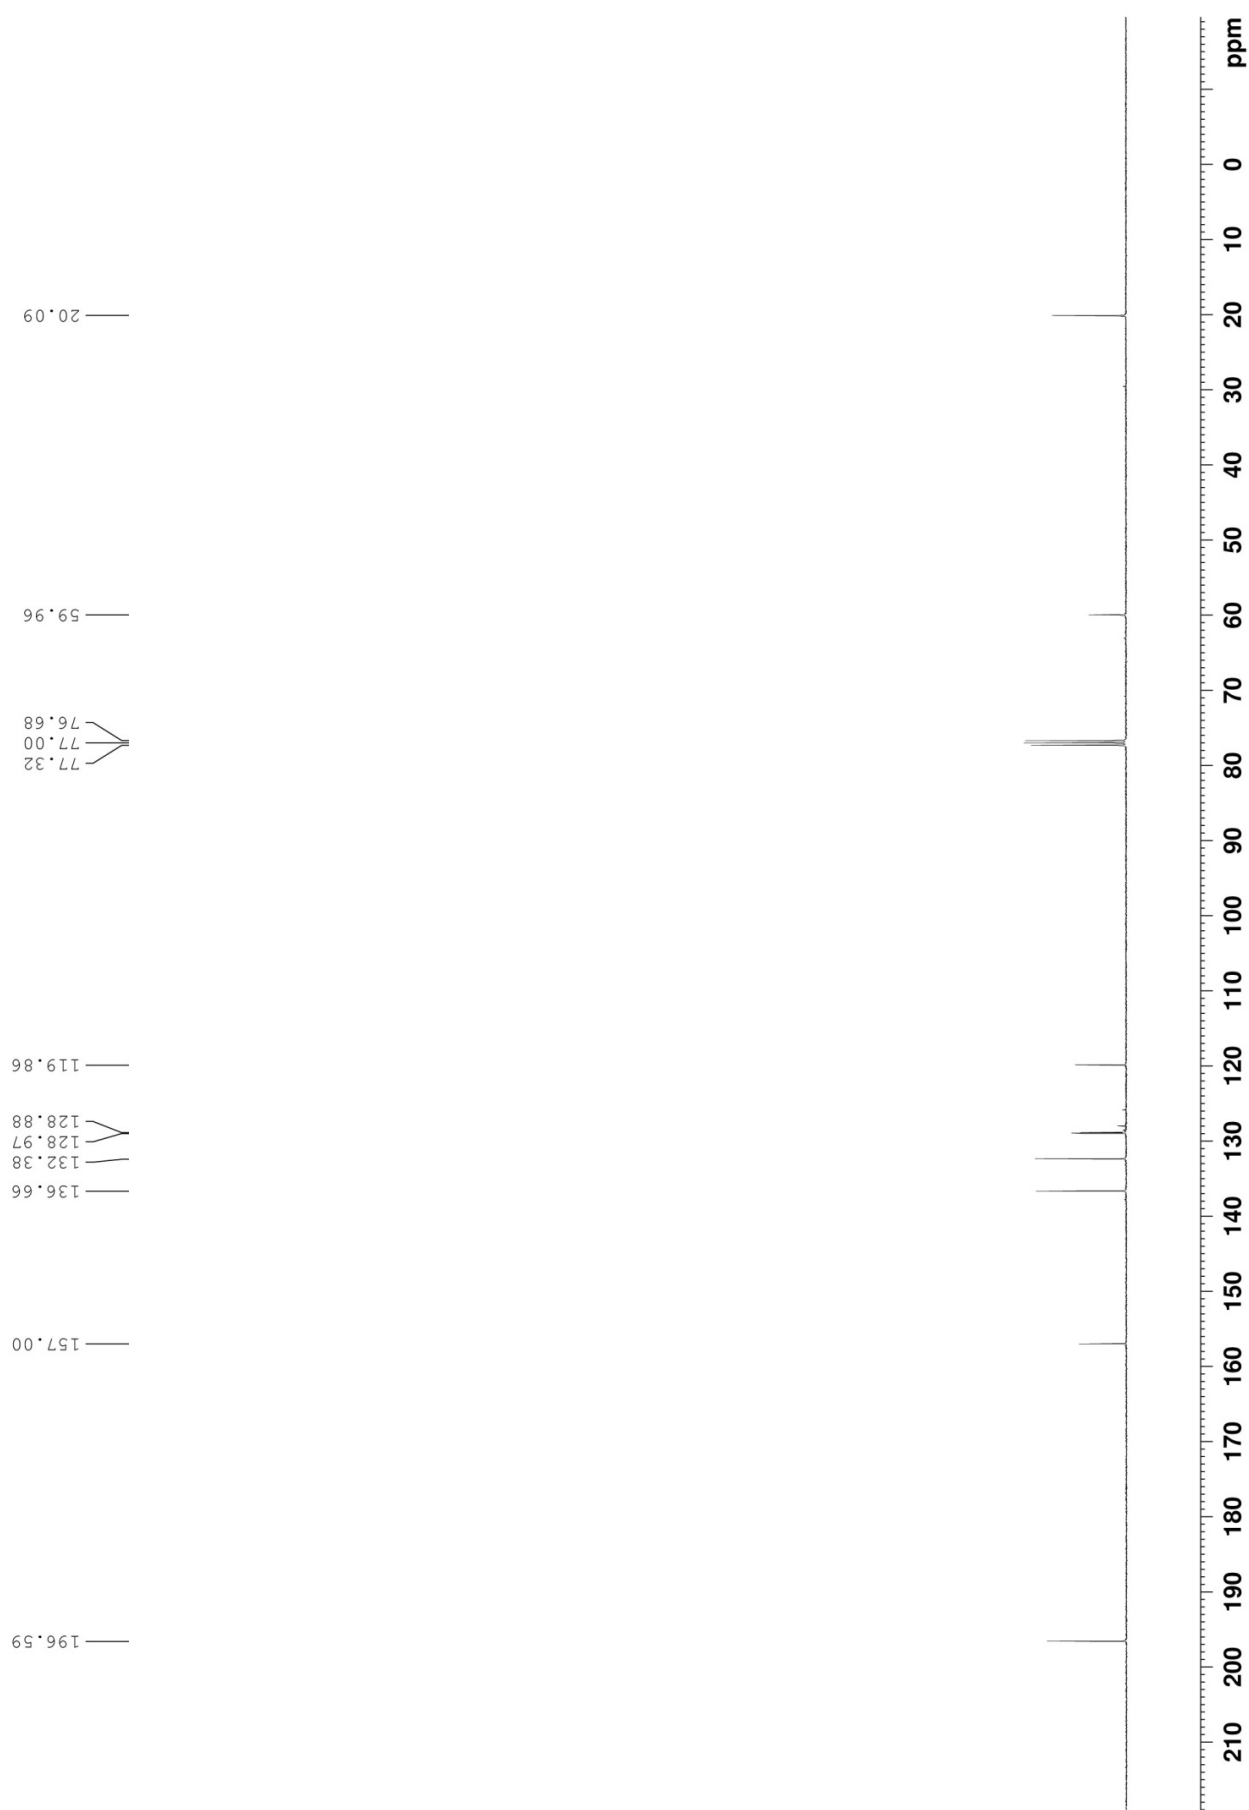

**Figure S2**  $^{13}\text{C}$  NMR ( $\text{CDCl}_3$ , 400 MHz) spectrum of Compound 2.

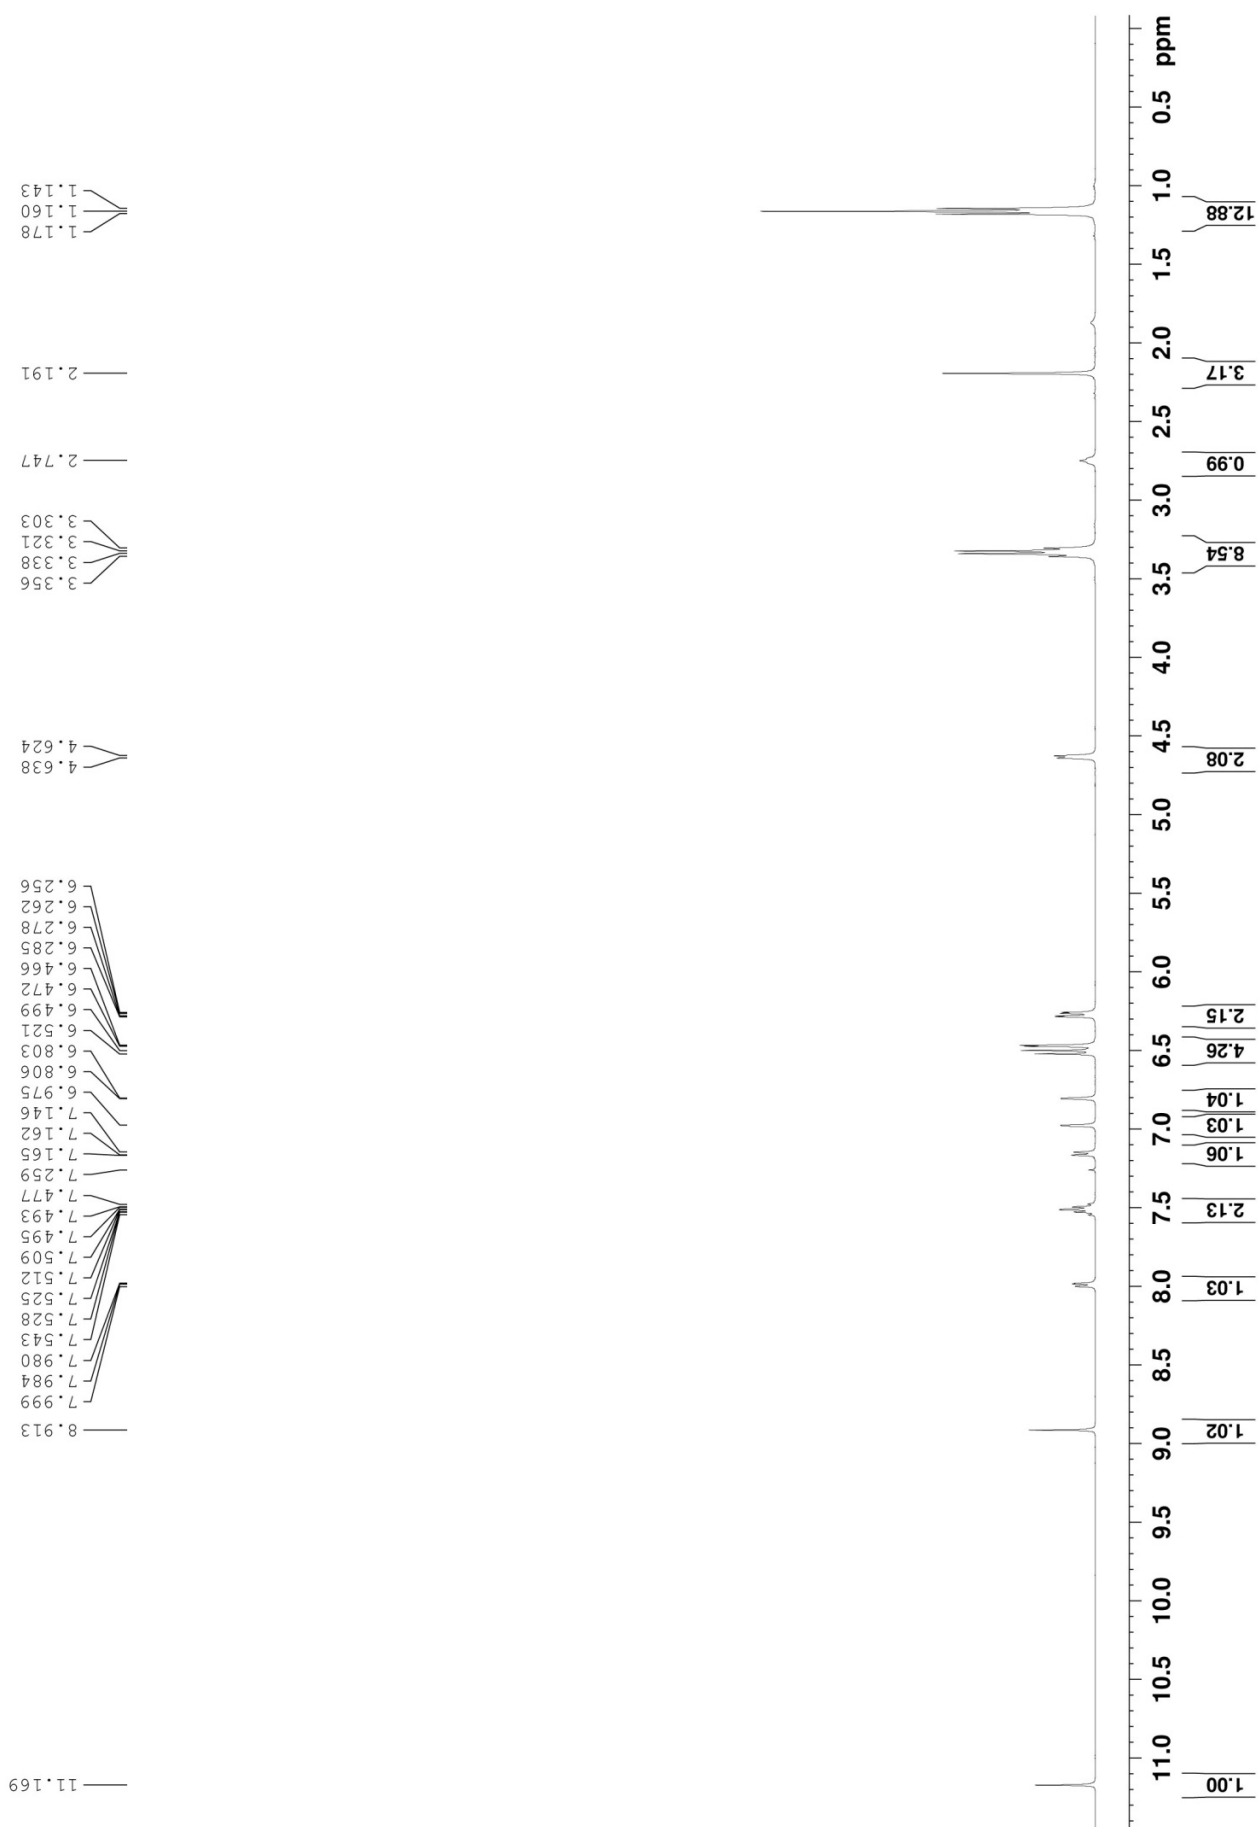

**Figure S3**  $^1\text{H}$  NMR ( $\text{CDCl}_3$ , 400 MHz) spectrum of **L**

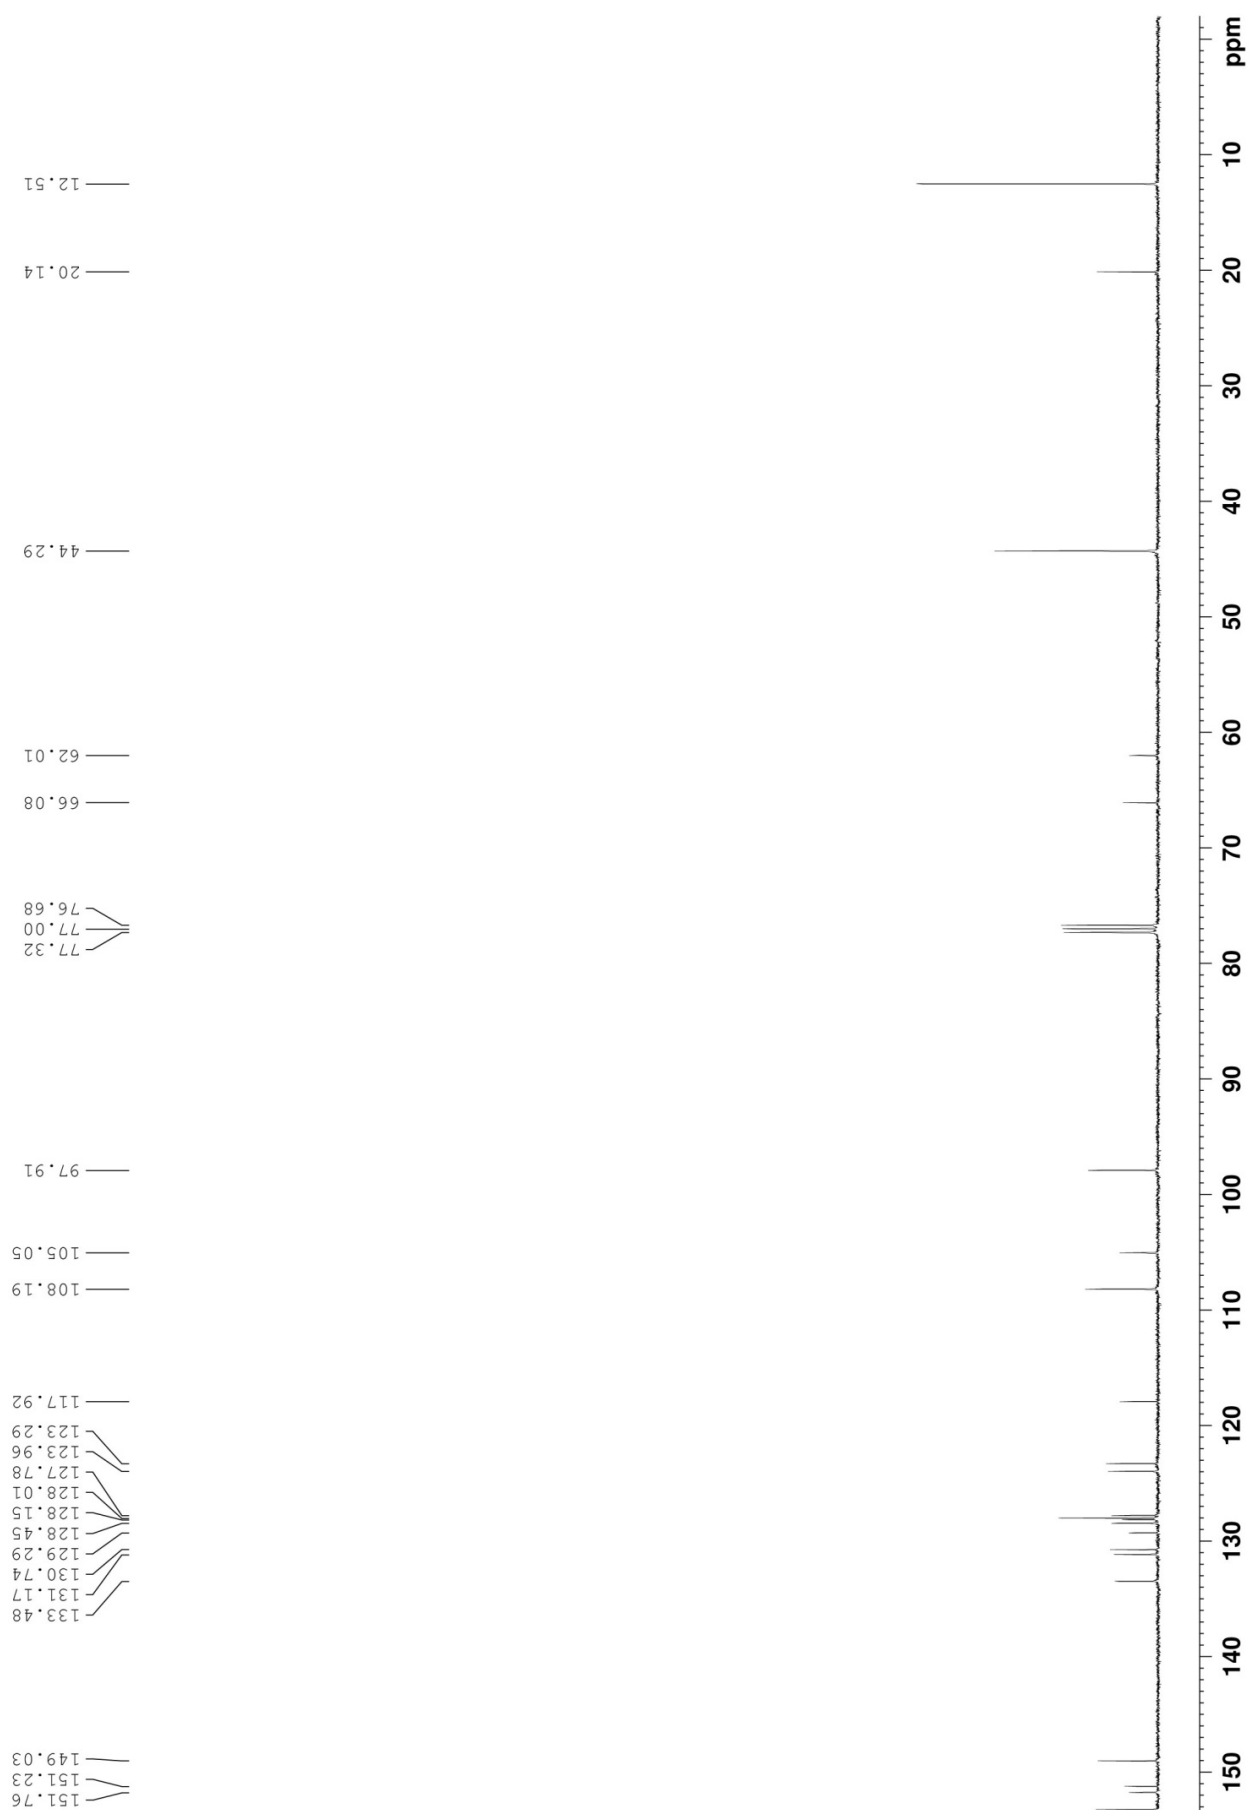

**Figure S4**  $^{13}\text{C}$  NMR ( $\text{CDCl}_3$ , 400 MHz) spectrum of **L**.

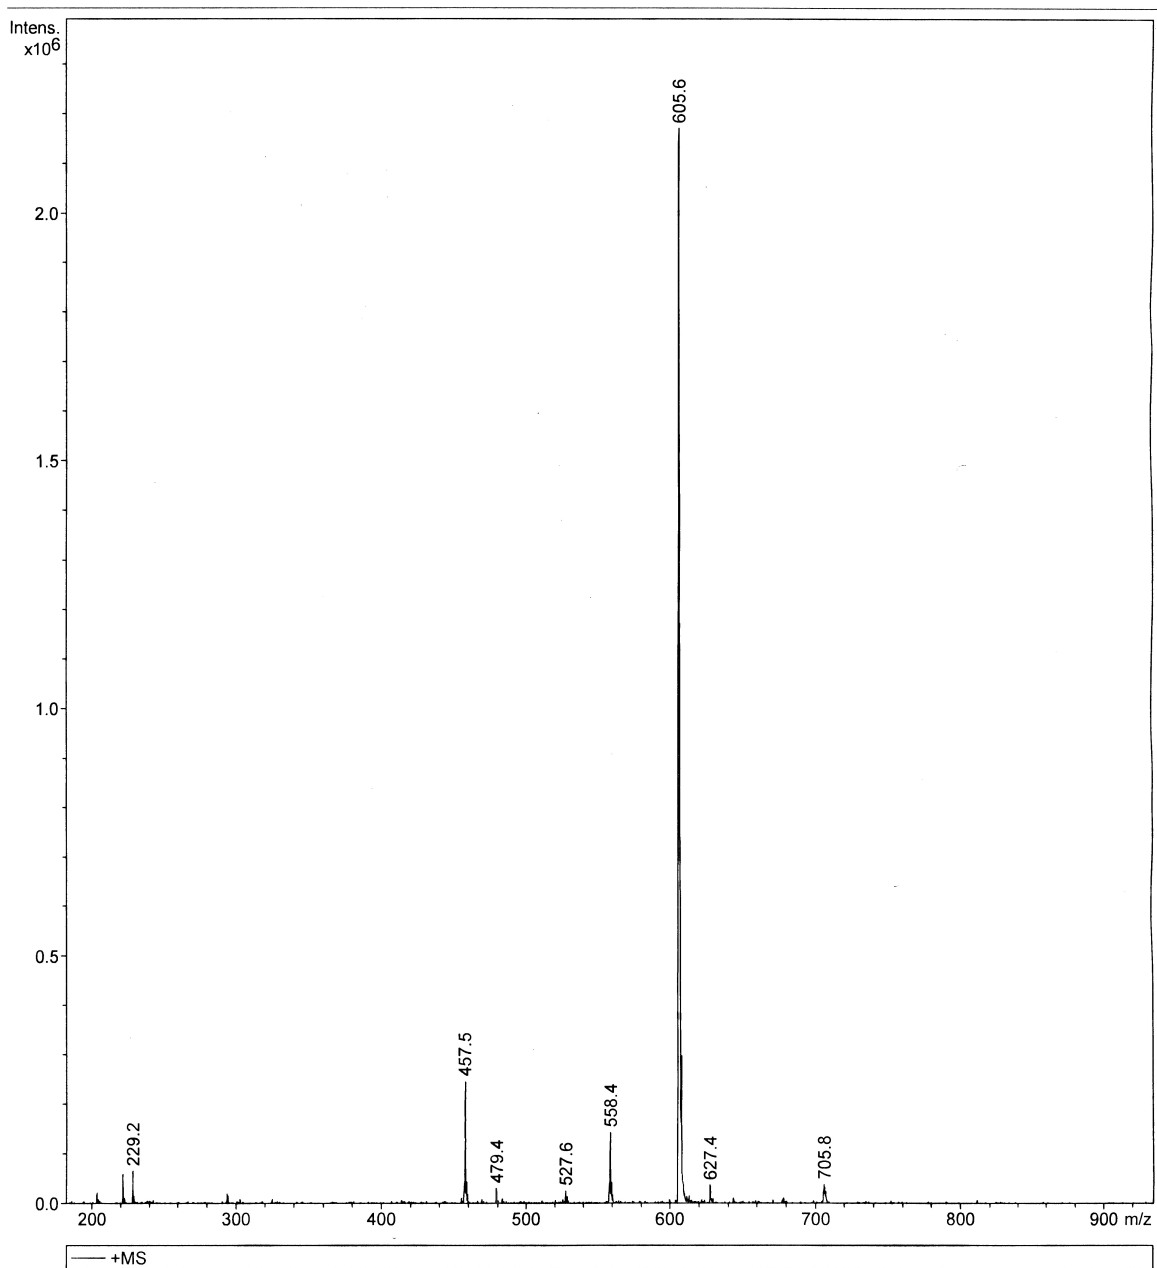

**Figure S5** ESI-MS spectrum of **L**

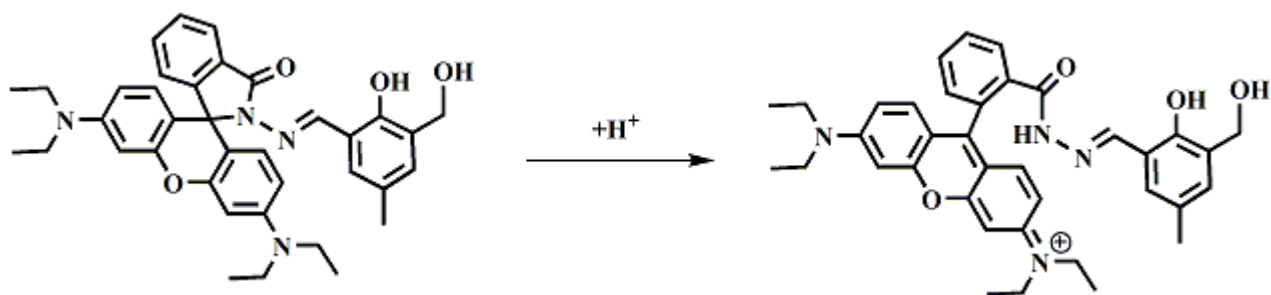

**Scheme S1** Proposed mechanism for the fluorescence enhancement of **L** upon the addition of  $H^+$

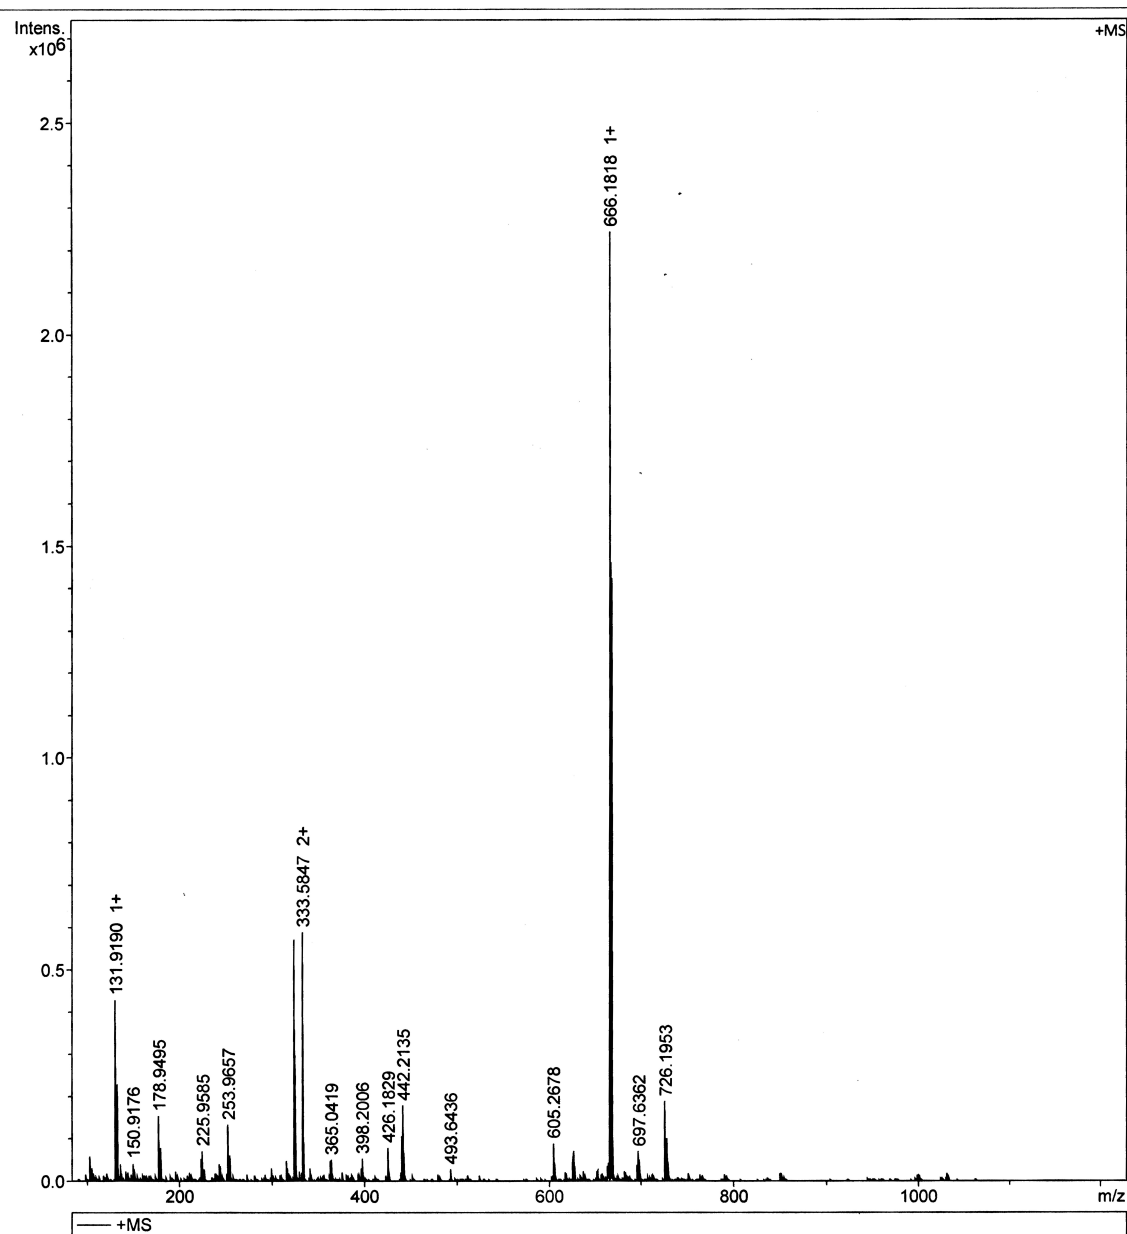

Figure S6. ESI-MS spectrum of L-Cu<sup>2+</sup>

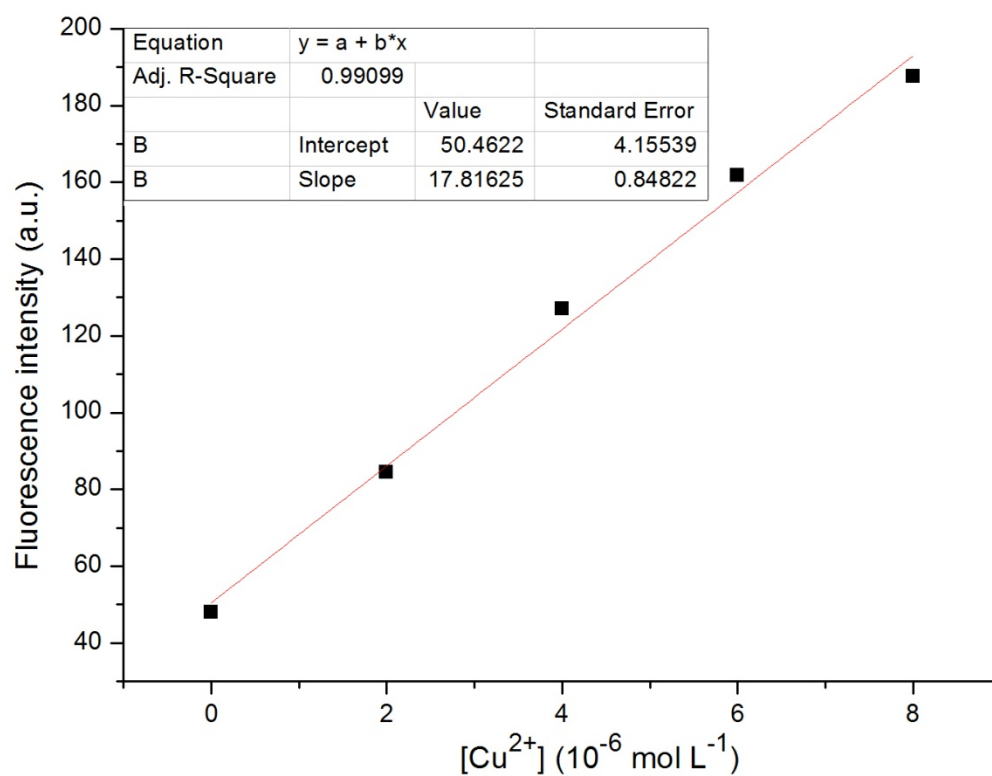

**Figure S7** Fluorescence intensity at 581 nm for **L** as a function of the concentration of Cu<sup>2+</sup> ion. The excitation wavelength is 530 nm.



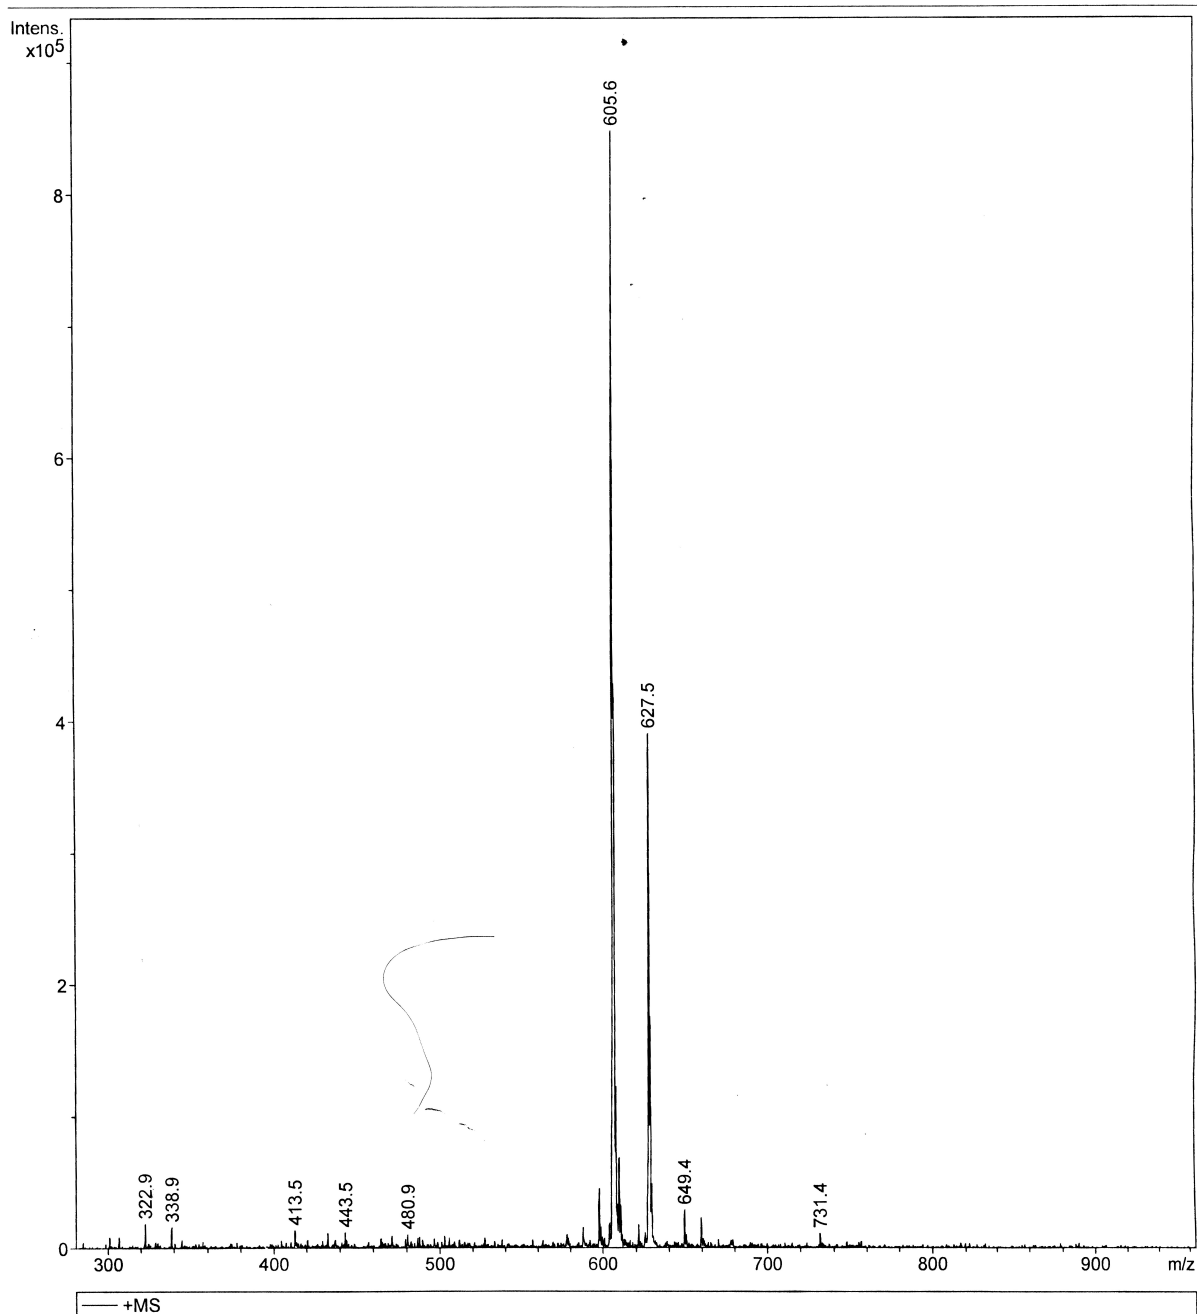

**Figure S8** ESI-MS spectrum of  $L-Cu^{2+} + S^{2-}$
